# Supplementary material
Source: PubMed Central journal article supplement (PMC3779928)
Supplement: NIHMS423897-supplement-supplemental_material.pdf [file NIHMS423897-supplement-supplemental_material.pdf]

*Submitted to the Annals of Applied Statistics*

**THE SCREENING AND RANKING ALGORITHM TO  
DETECT DNA COPY NUMBER VARIATIONS**

BY YUE S. NIU<sup>†</sup>, AND HEPING ZHANG<sup>‡</sup>

*University of Arizona<sup>†</sup> and Yale University<sup>‡</sup>*

---

\*The financial supports from University of Arizona Internal grant and National Institute on Drug Abuse grant R01-DA016750 are greatly acknowledged.

## APPENDIX A: GENERAL WEIGHT FUNCTIONS

In this section, we consider a family of local diagnostic functions, which is the weighted average of  $Y_i$ 's near the point of interest  $x$

$$D(x, h) = \sum_{i=1}^n w_i(x) Y_i,$$

where  $w_i(x) = w_{i-x}$ , and  $\mathbf{w} = (\cdots, w_{-1}, w_0, w_1, \cdots)$ , satisfying the following conditions:

1. local supportedness:  $\exists$  an integer  $h \ll n$ , such that  $w_i = 0$  for  $|i| > h$ ;
2. quasi-symmetry:  $i \cdot w_i \leq 0$  and  $\sum_{i \leq 0} w_i = -\sum_{i > 0} w_i$  i.e.  $\sum w_i = 0$ ;
3. unity:  $\sum_{i \leq 0} |w_i| = \sum_{i > 0} |w_i| = 1$ , and hence  $\|\mathbf{w}\|_{\ell_1} = \sum |w_i| = 2$ ;
4. negligibility:  $\|\mathbf{w}\|_{\ell_2}^2 / \|\mathbf{w}\|_{\ell_1}^2 = \sum w_i^2 / 4 = O(h^{-1})$ .

We denote by  $\mathcal{W}$  the set of all weight vectors satisfying these four conditions. These four conditions are quite natural. The locally supported condition makes  $D(x)$  depend on only those  $Y_i$ 's within distance  $h$ . The quasi-symmetric condition ensures that  $D(x)$  measures the difference between the left-hand-side  $Y_i$ 's and right-hand-side  $Y_i$ 's. The unity condition is not essential, but helpful for easy presentation. The negligible condition, a little stronger than the traditional negligible condition, prevents the weights from concentrating on few points as the bandwidth  $h$  tends to infinity. It is easy to see that all weights introduced in Section 2.2, up to a normalizing constant, are special cases of this family. Moreover, the SaRa with any local diagnostic function in this family satisfies the sure coverage property.

## APPENDIX B: PROOFS

We shall prove Theorem 1 in three steps, represented by three lemmas. We introduce the notation and outline the proof first.

A point  $x$  is called  $h$ -flat if there is no change-point in the  $h$ -neighborhood of  $x$ , i.e. the interval  $(x-h, x+h)$ . We omit  $h$  and say  $x$  is a flat point if  $h$  is obvious in the context. Let  $\mathcal{F}_h$  be the set of all  $h$ -flat points of step function  $\mu$ . Consider the event  $\mathcal{A}_\tau = \{|D(\tau, h)| > \lambda\}$  for change-point  $\tau \in \mathcal{J}$  and the event  $\mathcal{B}_x = \{|D(x, h)| < \lambda\}$  for flat point  $x \in \mathcal{F}_h$ . Define the event

$$\mathcal{E}_n = \left( \bigcap_{\tau \in \mathcal{J}} \mathcal{A}_\tau \right) \cap \left( \bigcap_{x \in \mathcal{F}_h} \mathcal{B}_x \right).$$

In Lemma 1, we derive the distribution of  $D(x, h)$  at a given point  $x$  when there is no change-point other than possibly  $x$  in the interval  $(x-h, x+h)$ .

Then we calculate the probability  $\mathbf{P}(\mathcal{E}_n)$  in Lemma 2. In the final step, we show that  $\mathcal{J} \subset: \hat{\mathcal{J}} \pm h$  holds under the event  $\mathcal{E}_n$ .

Lemma 1 *If the noises are i.i.d. Gaussian, then for fixed  $x$  and  $h$ ,  $D(x, h)$  is Gaussian. In particular, if  $x$  is a flat point,  $D(x, h) \sim \mathcal{N}(0, \Delta^2)$ . If  $\tau$  is a change-point with jump size  $\delta$ ,  $D(\tau, h) \sim \mathcal{N}(\delta, \Delta^2)$ . Here,*

$$\Delta^2 = \sum_i w_i^2 \sigma^2 = O(h^{-1})\sigma^2.$$

Proof of Lemma 1.  $D(x, h)$  is a linear combination of Gaussian variables, so it is Gaussian as well. It follows from the quasi-symmetric and unity conditions that the mean of  $D(x, h)$  is zero for a flat point and  $\delta$  for a change-point with jump size  $\delta$ . The variance is  $\sum_i w_i^2 \sigma^2$ , which is of order  $O(h^{-1})\sigma^2$  by the condition 4 on the family  $\mathcal{W}$ . In particular, for the equally weighted case (??),  $\Delta^2 = \frac{2}{h}\sigma^2$ .  $\square$

Lemma 2 *Under Assumption (??), there exist  $h$  and  $\lambda$  such that*

$$(B.1) \quad \mathbf{P}(\mathcal{E}_n) \rightarrow 1 \text{ as } n \rightarrow \infty.$$

Proof of Lemma 2. It suffices to show that there exist  $\lambda$  and  $h$  such that

$$\mathbf{P}(\mathcal{E}_n^c) \leq \mathbf{P} \left\{ \bigcup_{\tau \in \mathcal{J}} \mathcal{A}_\tau^c \right\} + \mathbf{P} \left\{ \bigcup_{x \in \mathcal{F}_h} \mathcal{B}_x^c \right\} \rightarrow 0.$$

Take  $\lambda = \frac{1}{2}\delta$  and  $h = \frac{1}{2}L$  where  $\delta = \min |\delta_j|$ ,  $L = \min_{1 \leq j \leq J+1} (\tau_j - \tau_{j-1})$ . By Lemma 1, it is obvious that for each  $\tau \in \mathcal{J}$  and  $x \in \mathcal{F}_h$ ,  $\mathbf{P}(\mathcal{A}_\tau^c) < 1 - \Phi(\frac{\delta}{2\Delta})$  and  $\mathbf{P}(\mathcal{B}_x^c) = 2(1 - \Phi(\frac{\delta}{2\Delta}))$ , where  $\Phi$  is the cumulative distribution function of standard normal distribution. Note the following inequality for the Gaussian tail probability (?)

$$1 - \Phi(t) < t^{-1} e^{-\frac{1}{2}t^2}.$$

By Bonferroni inequality and  $\Delta = \sqrt{2/h}\sigma = 2\sigma/\sqrt{L}$ , we have

$$(B.2) \quad \mathbf{P}(\mathcal{E}_n^c) < 2n \frac{2\Delta}{\delta} e^{-\frac{\delta^2}{8\Delta^2}} = \frac{8n\sigma}{\delta\sqrt{L}} e^{-\frac{L\delta^2}{32\sigma^2}} = \frac{8n}{S} e^{-\frac{S^2}{32}}.$$

It is guaranteed by Assumption (??) that the right hand side of (B.2) goes to zero as  $n \rightarrow \infty$ .  $\square$

Lemma 3  $\mathcal{J} \subset: \hat{\mathcal{J}} \pm h$  holds under event  $\mathcal{E}_n$ .

Proof of Lemma 3. We want to show that there is a one-to-one correspondence between  $\mathcal{J}$  and  $\hat{\mathcal{J}}$ . Under event  $\mathcal{E}_n$ , no flat points can be selected into  $\hat{\mathcal{J}}$  at the screening step. In other words, for any point  $\hat{\tau} \in \hat{\mathcal{J}}$ , there is at least one change-point in its  $h$ -neighborhood  $(\hat{\tau} - h, \hat{\tau} + h)$ . In fact, there is at most one such change-point by our assumption that  $L = 2h$ . Therefore, there is exactly one change-point within  $(\hat{\tau} - h, \hat{\tau} + h)$  for each  $\hat{\tau} \in \hat{\mathcal{J}}$ . On the other hand, under event  $\mathcal{E}_n$ , for every change-point  $\tau \in \mathcal{J}$ , we have  $|D(\tau, h)| > \lambda$ . Moreover,  $\tau - h$  and  $\tau + h$  must be flat points since  $L = 2h$ . It follows that  $\max\{|D(\tau - h, h)|, |D(\tau + h, h)|\} < \lambda$  and there is a local maximum, say  $\hat{\tau}$ , which is in  $(\tau - h, \tau + h)$  and  $|D(\hat{\tau}, h)| \geq |D(\tau, h)| > \lambda$ .  $\square$

DR. YUE S. NIU  
DEPARTMENT OF MATHEMATICS  
THE UNIVERSITY OF ARIZONA  
TUCSON AZ, 85721  
E-MAIL: yueniu@math.arizona.edu

PROFESSOR HEPING ZHANG  
DEPARTMENT OF EPIDEMIOLOGY AND  
PUBLIC HEALTH, YALE UNIVERSITY  
SCHOOL OF MEDICINE, NEW HAVEN CT, 06520  
E-MAIL: heping.zhang@yale.edu
